# Supplementary material for: Placental macrophages present distinct polarization pattern and effector functions depending on clinical onset of preeclampsia
Source: PubMed Central journal article supplement (PMC9878680; doi:10.3389/fimmu.2022.1095879), 2023-01-12
Supplement: DataSheet_1.pdf [file DataSheet_1.pdf]

## *Supplementary Material*

### **Supplementary methods**

#### **Isolation of human arterial endothelial cells (fpEC)**

Primary fpECs were isolated from chorionic arterial blood vessels (CTR n=5, EO-PE n=3) as described by Lang et al (51). Isolated fpECs were cultured at 12% oxygen and 37 °C on 1% gelatin-coated flasks (Sigma Aldrich) using Endothelial Cell Growth Medium MV (Promocell) supplemented with 5% FCS (Promocell), hydrocortisone (Promocell), ECGS (Promocell), and 1% gentamicin (Thermo Fischer Scientific).

#### **Proliferation assay**

##### **BrDU**

To measure the proliferation of EO-PE and CTR fpEC, BrDU colorimetric cell proliferation ELISA kit (Roche) was used according to the manufacturer's recommendation. fpEC were seeded overnight at a cell density of  $2 \times 10^6$  cells/mL in Endothelial Cell Growth Medium MV (Promocell). The medium was then replaced with a pool of conditioned medium (CM) obtained from 10 different CTR and 5 EO-PE HBC isolations. CM was diluted 1:1 with full fpEC medium. Incubated macrophage medium without cells diluted with endothelial medium served as a control. After 24 hours of treatment with CM, 10  $\mu$ L of BrDU reagent was added and incubated for 3 hours. After fixation, denaturation and incubation with the anti-BrdU-POD working solution, cells were intensively washed and in final step incubated with the substrate solution for 25 minutes. Afterwards, absorbance was measured at 492 nm using the SPECTROstar Nano plate reader (BMG Lab Technologies).

##### **MTS**

This assay (Cell titer 96 Aqueous one solution cell, Promega) was applied according to the manufacturer's instructions. EO-PE and CTR fpEC were seeded in a gelatin-coated 96-well plate at a cell density of  $1 \times 10^6$  cells/mL in Endothelial Cell Growth Medium MV containing supplements (Promocell) and cultured overnight. The medium was then replaced with a pool of CM obtained from 10 different CTR and 5 EO-PE HBC isolations. The CM was diluted 1:1 with the complete fpEC medium. Incubated macrophage medium without HBCs, diluted with fpEC medium served as a control. After 24 hours of treatment, 20  $\mu$ L of MTS reagent was added to the cells and incubated for 4 hours. Absorbance was measured at 492 nm using the SPECTROstar Nano plate reader (BMG Labtech).

### **Supplementary Tables**

**Table S1: List of antibodies and their concentrations used for the FACS analysis**

| Antibody                                                       | Distributor / Catalog number | Concentration            |
|----------------------------------------------------------------|------------------------------|--------------------------|
| APC anti-human CD163 Antibody                                  | BioLegend / 333609           | 15 $\mu$ l / 100 $\mu$ l |
| PE Mouse Anti-Human CD68                                       | BD Pharmingen™ / 556078      | 10 $\mu$ l / 100 $\mu$ l |
| V450 Mouse Anti-Human CD11b                                    | BD Pharmingen™ / 560481      | 5 $\mu$ l / 100 $\mu$ l  |
| PE Mouse Anti-Human CD11c                                      | BD Pharmingen™ / 560999      | 5 $\mu$ l / 100 $\mu$ l  |
| FITC Mouse Anti-Human CD206                                    | BD Pharmingen™ / 551135      | 5 $\mu$ l / 100 $\mu$ l  |
| PerCP-Cy™5.5 Mouse Anti-Human CD209                            | BD Pharmingen™ / 558263      | 10 $\mu$ l / 100 $\mu$ l |
| V450 Mouse Anti-Human CD80                                     | BD Pharmingen™ / 560442      | 10 $\mu$ l / 100 $\mu$ l |
| V450 Mouse Anti-Human CD86                                     | BD Pharmingen™ / 560357      | 5 $\mu$ l / 100 $\mu$ l  |
| FITC Anti-TIL/TLR1 antibody                                    | Abcam / ab59702              | 5 $\mu$ l / 100 $\mu$ l  |
| Human TLR4 PE-conjugated Antibody                              | R&D / FAB6248P               | 5 $\mu$ l / 100 $\mu$ l  |
| Pacific Blue™ anti-human HLA-DR Antibody                       | BioLegend / 307633           | 5 $\mu$ l / 100 $\mu$ l  |
| APC anti-human Folate Receptor $\beta$ (FR- $\beta$ ) Antibody | BioLegend / 391705           | 2 $\mu$ l / 100 $\mu$ l  |
| FITC Anti-TLR2 antibody                                        | abcam / ab59711              | 3 $\mu$ l / 100 $\mu$ l  |
| PE Mouse Anti- IRF4                                            | BD Pharmingen™ / 566646      | 5 $\mu$ l / 100 $\mu$ l  |

|                                                   |                          |                |
|---------------------------------------------------|--------------------------|----------------|
| IRF5 Monoclonal Antibody (ALYSCLN), eFluor 660    | Invitrogen / 50-9698- 41 | 5 µl / 100 µl  |
| FITC Mouse Anti-Human CD40                        | BD Pharmingen™ / 556624  | 5 µl / 100 µl  |
| 7-AAD                                             | BD Pharmingen™ / 559925  | 5 µl / 100 µl  |
| FITC Mouse IgG1 K Isotype Control                 | BD Pharmingen™/ 555748   | 5 µl / 100 µl  |
| PerCP-Cy™5.5 Mouse IgG1 κ Isotype Control         | BD Pharmingen™/ 550795   | 10 µl / 100 µl |
| Pacific Blue™ Mouse IgG1, κ Isotype Ctrl Antibody | BioLegend / 400151       | 5 µl / 100 µl  |
| V450 Mouse IgG1/ κ Isotype Control                | BD Pharmingen™ / 560373  | 5 µl / 100 µl  |
| APC Mouse IgG1 K Isotype Control                  | BD Pharmingen™/ 555751   | 10 µl / 100 µl |
| PE Mouse IgG1 K Isotype Control                   | BD Pharmingen™/ 555749   | 5 µl / 100 µl  |

**Table S2: List of primer assays used for the RT-qPCR analysis**

| Target       | Assay                                              | Supplier |
|--------------|----------------------------------------------------|----------|
| <i>RPL30</i> | Hs_RPL30_1_SG QuantiTect Primer Assay (QT00056651) | Quiagen  |
| <i>HPRT1</i> | Hs_HPRT1_1_SG QuantiTect Primer Assay (QT00059066) | Quiagen  |
| <i>MMP9</i>  | Hs_MMP9_1_SG QuantiTect Primer Assay (QT00040040)  | Quiagen  |

|              |                                                                               |                |
|--------------|-------------------------------------------------------------------------------|----------------|
| <i>MMP12</i> | Hs_MMP12_1_SG QuantiTect Primer Assay<br>(QT01004472)                         | Quiagen        |
| <i>TIMP1</i> | Hs_TIMP1_1_SG QuantiTect Primer Assay<br>(QT00084168)                         | Quiagen        |
| <i>TIMP2</i> | Hs_TIMP2_1_SG QuantiTect Primer Assay<br>(QT00017759)                         | Quiagen        |
| <i>CCL4</i>  | Hs_CCL4_1_SG QuantiTect Primer Assay<br>(QT01008070)                          | Quiagen        |
| <i>IL6</i>   | Hs_IL6_1_SG QuantiTect Primer Assay<br>(QT00083720)                           | Quiagen        |
| <i>CXCL8</i> | Hs_CXCL8_1_SG QuantiTect Primer Assay<br>(QT00000322)                         | Quiagen        |
| <i>ICAM</i>  | Hs_ICAM1_1_SG QuantiTect Primer Assay<br>(QT00074900)                         | Quiagen        |
| <i>VCAM</i>  | Hs_VCAM1_1_SG QuantiTect Primer Assay<br>(QT00018347)                         | Quiagen        |
| <i>TGFB1</i> | Hs_TGFB1_1_SG QuantiTect Primer Assay<br>(QT00000728)                         | Quiagen        |
| <i>IL10</i>  | Hs_IL10_1_SG QuantiTect Primer Assay<br>(QT00041685)                          | Quiagen        |
| 18S          | Forward (5'-3') CTACCACATCCAAGGAAGCA<br>Reverse (5'-3') TTTTTCGTCACTACCTCCCCG | Sigma- Aldrich |
| <i>NFKB1</i> | KiCqStart™ Primer: H_NFKB1_1                                                  | Sigma- Aldrich |
| <i>LEP</i>   | KiCqStart™ Primer: H_LEP_1                                                    | Sigma- Aldrich |
| <i>HIF1A</i> | KiCqStart™ Primer: H_HIF1A_1                                                  | Sigma- Aldrich |
| <i>SOD</i>   | KiCqStart™ Primer: H_SOD1_1                                                   | Sigma- Aldrich |

|              |                              |                |
|--------------|------------------------------|----------------|
| <i>CAT</i>   | KiCqStart™ Primer: H_CAT_1   | Sigma- Aldrich |
| <i>ARG1</i>  | KiCqStart™ Primer: H_ARG1_1  | Sigma- Aldrich |
| <i>IL1A</i>  | KiCqStart™ Primer: H_IL1A_1  | Sigma- Aldrich |
| <i>IL1B</i>  | KiCqStart™ Primer: H_IL1B_1  | Sigma- Aldrich |
| <i>TNF</i>   | KiCqStart™ Primer: H_TNF_1   | Sigma- Aldrich |
| <i>FLT1</i>  | KiCqStart™ Primer: H_FLT1_1  | Sigma- Aldrich |
| <i>VEGFA</i> | KiCqStart™ Primer: H_VEGFA_1 | Sigma- Aldrich |
| <i>KDR</i>   | KiCqStart™ Primer: H_KDR_1   | Sigma- Aldrich |
| <i>CDH2</i>  | KiCqStart™ Primer: H_CDH2_1  | Sigma- Aldrich |
| <i>CDH5</i>  | KiCqStart™ Primer: H_CDH5_1  | Sigma- Aldrich |
| <i>NOS2</i>  | KiCqStart™ Primer: H_NOS2_1  | Sigma- Aldrich |

## Supplementary Figures

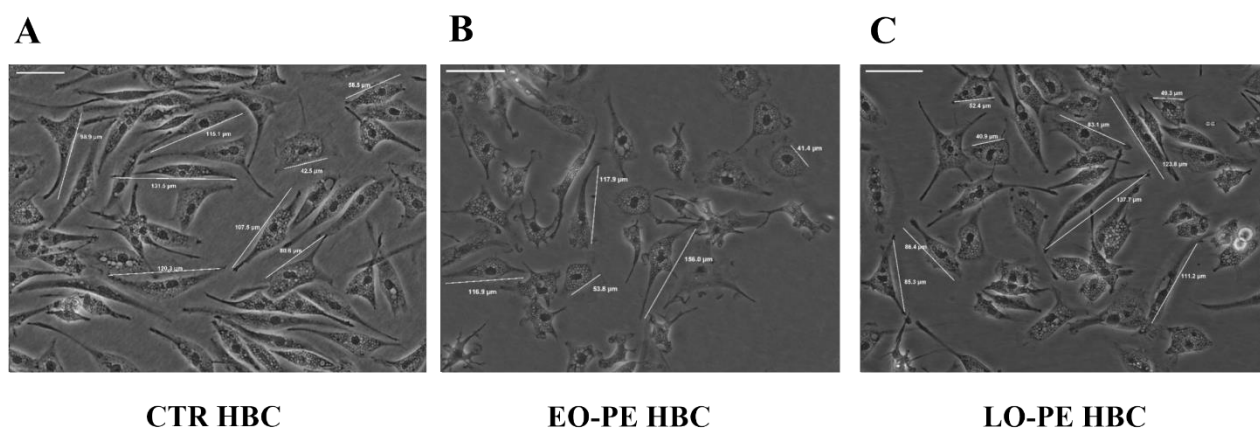

**Figure S1:** Cell morphology and characterization of CTR (A), early onset (EO-) (B) and late onset (LO-) PE (C) HBCs isolated from term placentae. Representative images of HBCs taken on the 5th day post isolation are shown. Scale bar represents 50µm, cell size was measured using CellSens measuring tool.

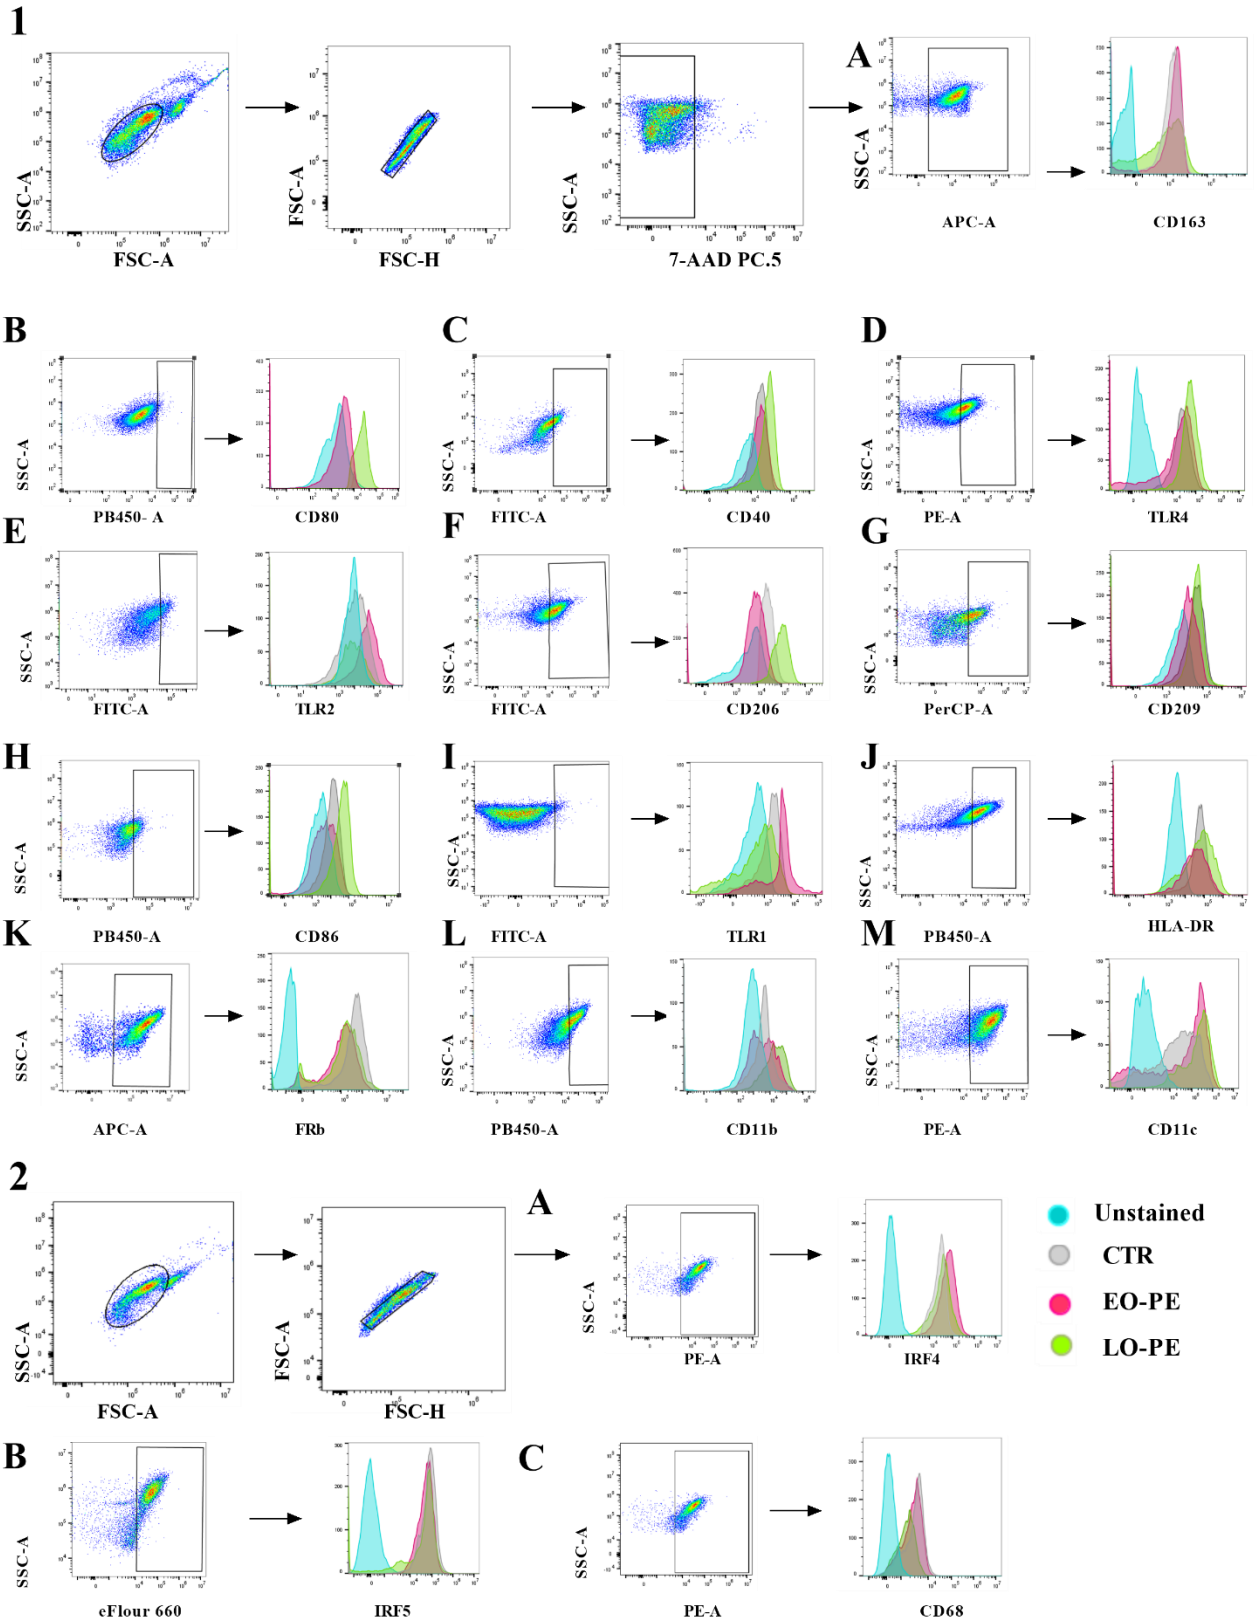

**Figure S2:** Representative gating strategy to identify the expression of specific surface (1) and intracellular (2) polarization markers. (1A) CD163, (1B) CD80, (1C) CD40, (1D) TLR4, (1E) TLR2, (1F) CD206, (1G) CD209, (1H) CD86, (1I) TLR1, (1J) HLA-DR, (1K) folate receptor- $\beta$  (FR $\beta$ ), (1L) CD11b, (1M) CD11c, respectively. (2) Staining against intracellular markers: (2A) IRF4, IRF5 (2B), and (2C) CD68, respectively. Blue histogram peaks represent unstained samples, grey represents CTR HBCs, red represents EO-PE HBCs and green represents LO-PE HBCs. Histograms of one representative experiment are shown, in total a number of isolations of CTR (n=14), EO (n=6) and LO (n=5) were used.

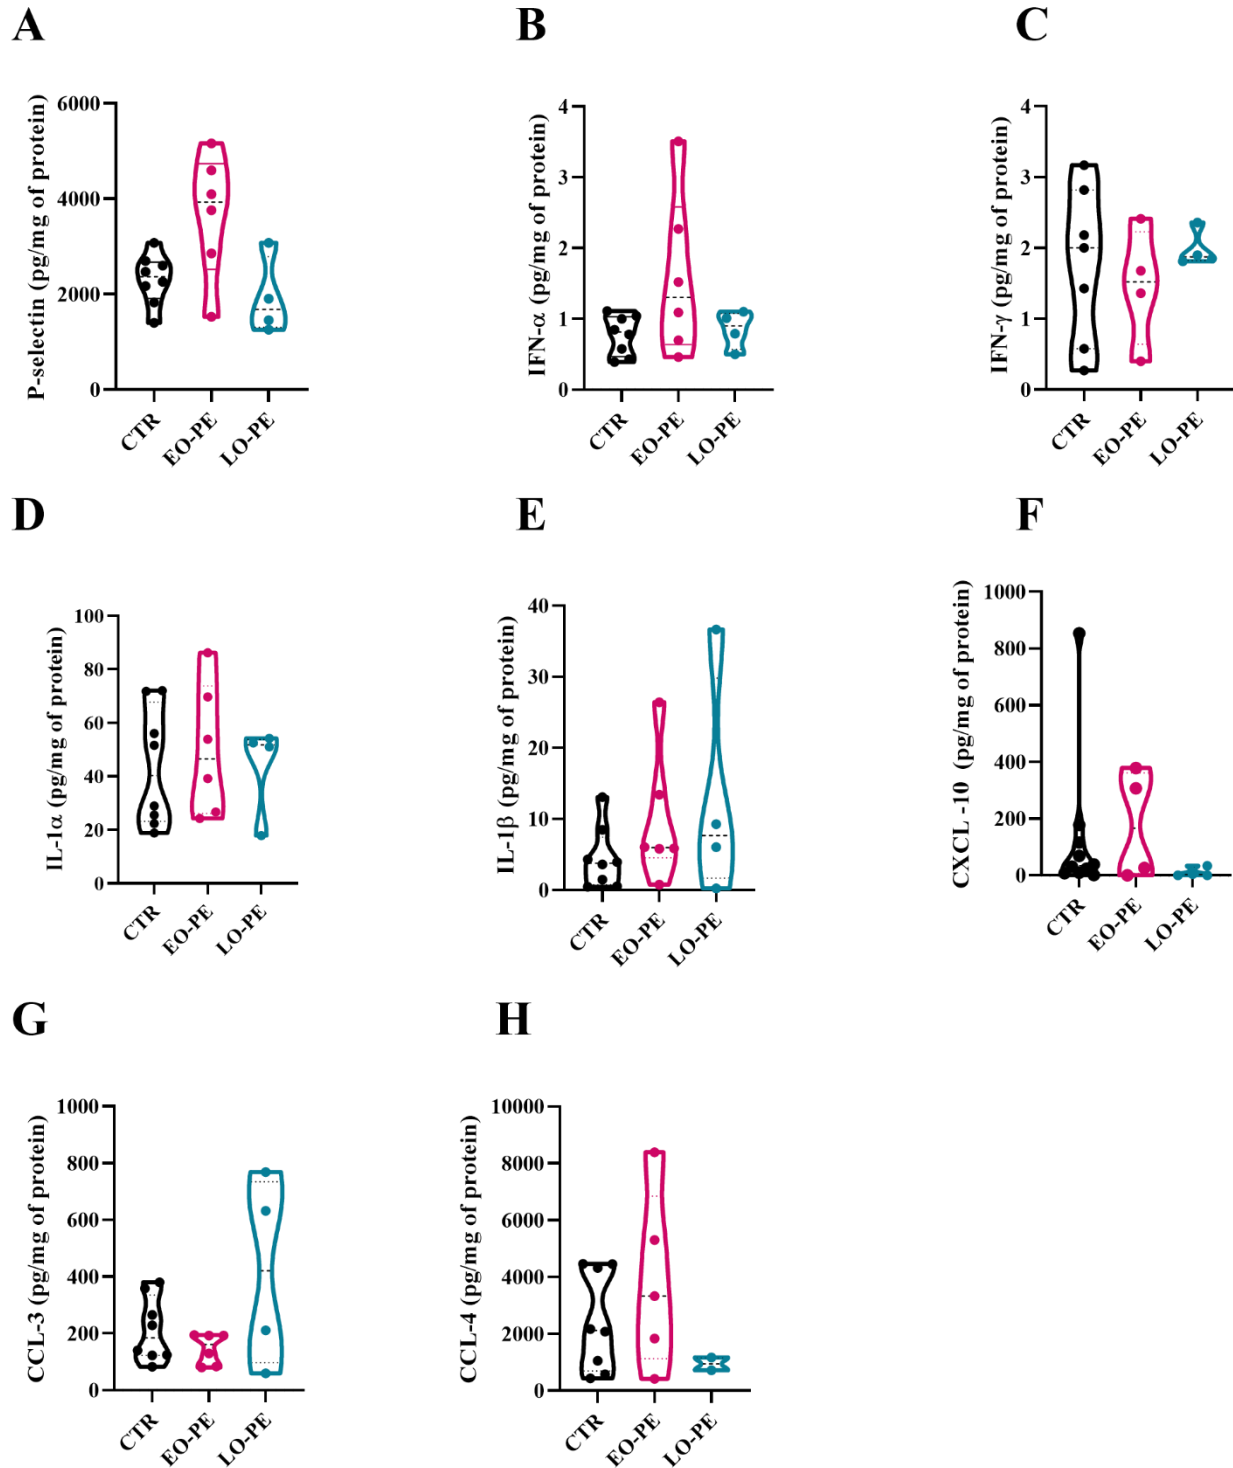

**Figure S3:** Secretion of pro- and anti-inflammatory cytokines CTR (n=8), EO- (n=6) and LO-PE (n=4) HBCs. Multiplex-ELISA-on-beads assay for followed pro-inflammatory and anti-inflammatory cytokines (A) P-selectin, (B) IFN- $\alpha$ , (C) IFN-  $\gamma$ , (D) IL-1 $\beta$ , (E) IL-17a, (F) CXCL-10, (G) CCL-3 and (H) CCL-4, respectively. Multiplex was performed in duplicates. Secretion of respective cytokines



was normalized to the total protein content measured in the cell culture supernatants. Statistical significance was assessed using ANCOVA with adjustment for gestational age followed by Sidak's post-hoc test. \* $p \leq 0.05$ .

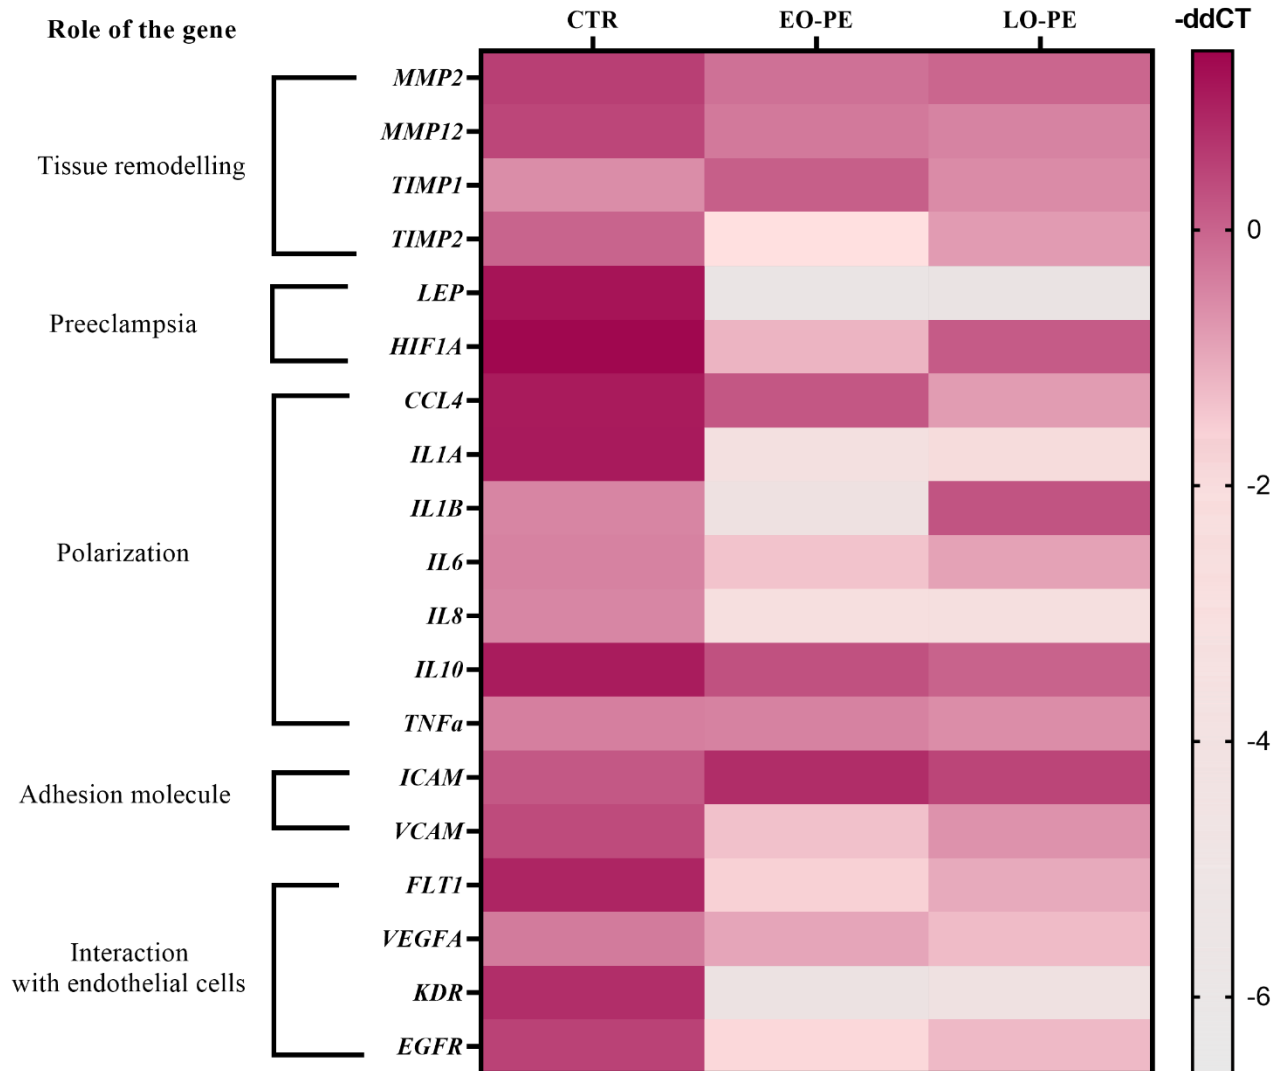

**Figure S4:** Preeclampsia alters inflammatory related gene expression in HBCs. Total RNA of cultivated HBCs was harvested on the fifth day post isolation and analysed by RT-qPCR. Genes associated with PE, inflammation and regulation of polarization are shown on the heat map. In total 12 CTR, 5 EO-PE and 5 LO-PE HBCs isolations in three technical replicates were used. Expression of target genes was normalized to the following housekeeping genes (*18S*, *RPL30* and *HPRT1*) using  $2^{-\Delta\Delta Ct}$  method. Statistical significance was tested using ANCOVA with adjustment for gestational age followed by Sidak's post-hoc test. \* $p \leq 0.05$ .

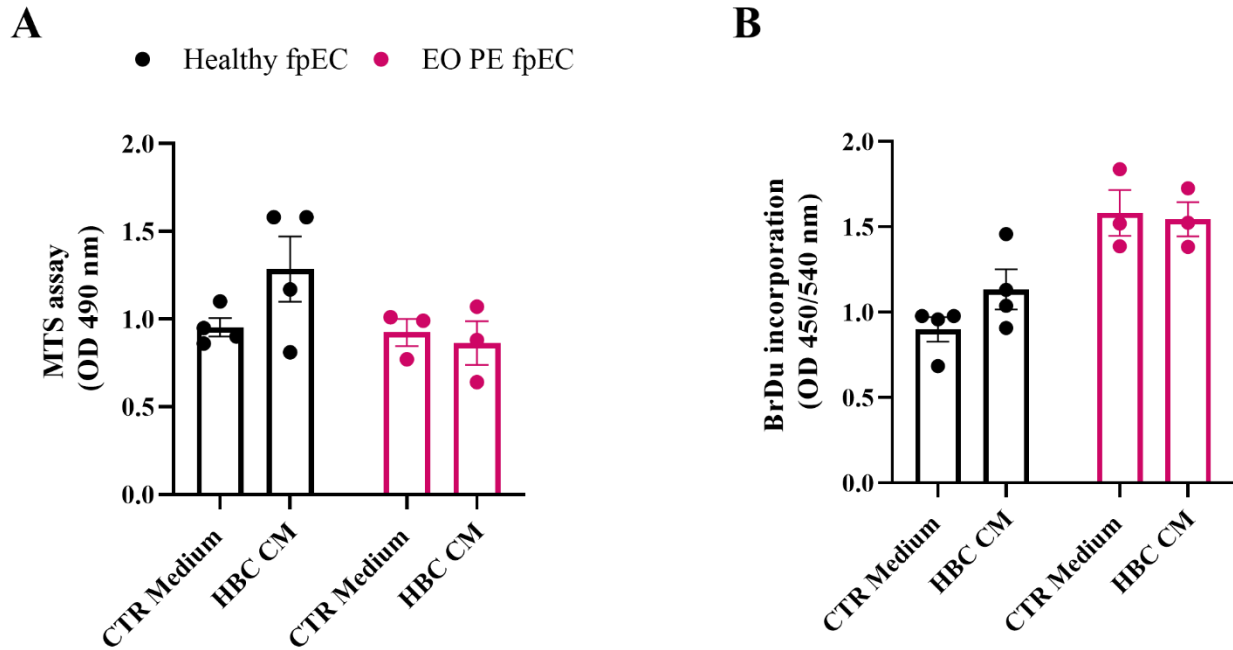

**Figure S5:** Effect of CTR and EO-PE conditioned medium (CM) of HBCs on the proliferation of CTR and PE fpECA. CM from 5 different HBC isolations was used for proliferation assays with CTR (n=4) and PE (n=3) fpECA. As a CTR medium cultivated Macrophage medium without cells was used. Healthy fpEC were treated with CM collected from healthy HBCs and PE fpEC with CM collected from EO-PE HBCs, respectively. CM of CTR HBCs tend to have an effect on proliferation of fpEC measured with MTS assay (A) and BrDU assay (B). Data are presented as the mean of the technical triplicates of the number of individual biological replicates of fpECA. To test statistical significance Two-way ANOVA with Sidak's post-hoc test was used. Data are shown as mean  $\pm$  S.E.M. p-value  $\leq 0.05$  was considered statistically significant.

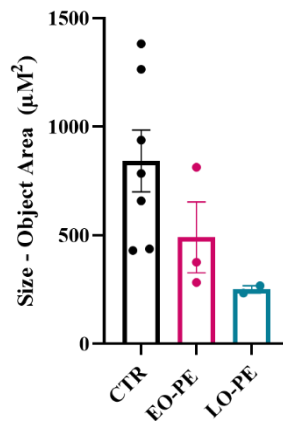

**Figure S6:** Measurement of morphology (size-object area,  $\mu\text{M}^2$ ) using high content screening (HCS). Measurement of the size of the HBCs was performed using NisViewer software. All data in are

presented as mean  $\pm$  S.E.M, ANCOVA with adjustment for gestational age with Sidak's post-hoc test was used for to test statistical significance. \* $p \leq 0.05$ .
